# Supplementary material
Source: Springer Nature journal article supplement (https://www.springermedizin.de/resource/supplementary/12936_2006_208_MOESM1_ESM.pdf/9547190)

1 2 3 4 5 6 7 8 MW

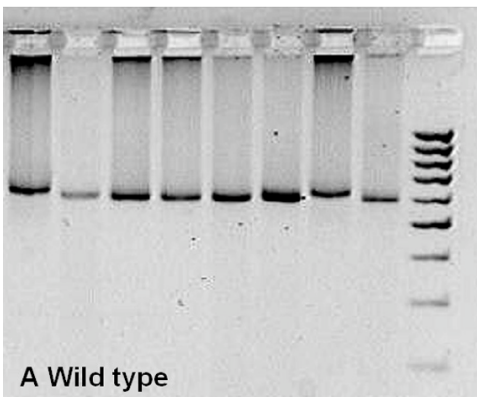

1 2 3 4 5 6 7 MW

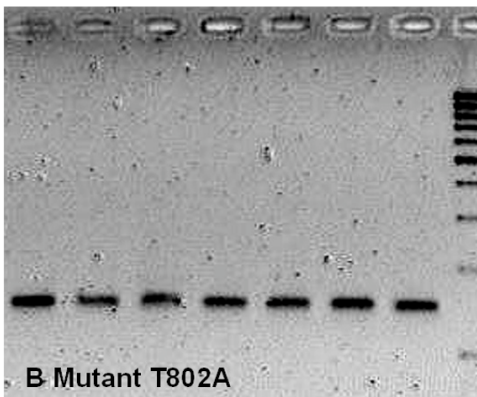

1 2 3 4 5 6 7 MW

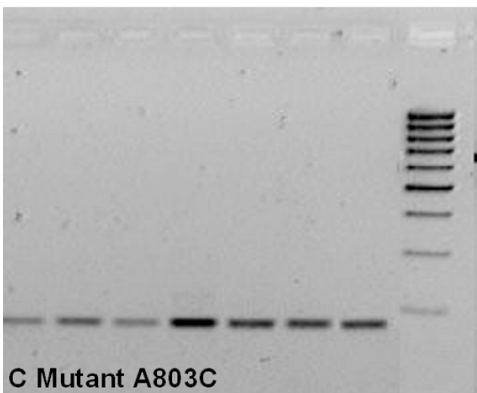

Supplement: MOESM1 [file 9547190]
